# Supplementary material for: Rational design of ROS-responsive nanocarriers for targeted X-ray-induced photodynamic therapy and cascaded chemotherapy of intracranial glioblastoma
Source: Royal Society of Chemistry journal article supplement (doi:10.1039/d2nr00436d), 2022-01-01
Supplement: d2nr00436d1.pdf [file d2nr00436d1.pdf]

# **Rational Design of ROS-Responsive Nanocarriers for Targeted X-ray-Induced Photodynamic Therapy and Cascaded Chemotherapy of Intracranial Glioblastoma**

Beibei Zhang<sup>†</sup>, Rui Xue<sup>†</sup>, Chunyang Sun<sup>†, ‡, \*</sup>

<sup>†</sup> Department of Radiology and Tianjin Key Laboratory of Functional Imaging, Tianjin Medical University General Hospital, Tianjin 300052, P.R. China

<sup>‡</sup> Multimodality Preclinical Molecular Imaging Center, Tianjin Medical University General Hospital, Tianjin 300052, P.R. China

E-mail: chysunshine@gmail.com (C. Y. Sun)

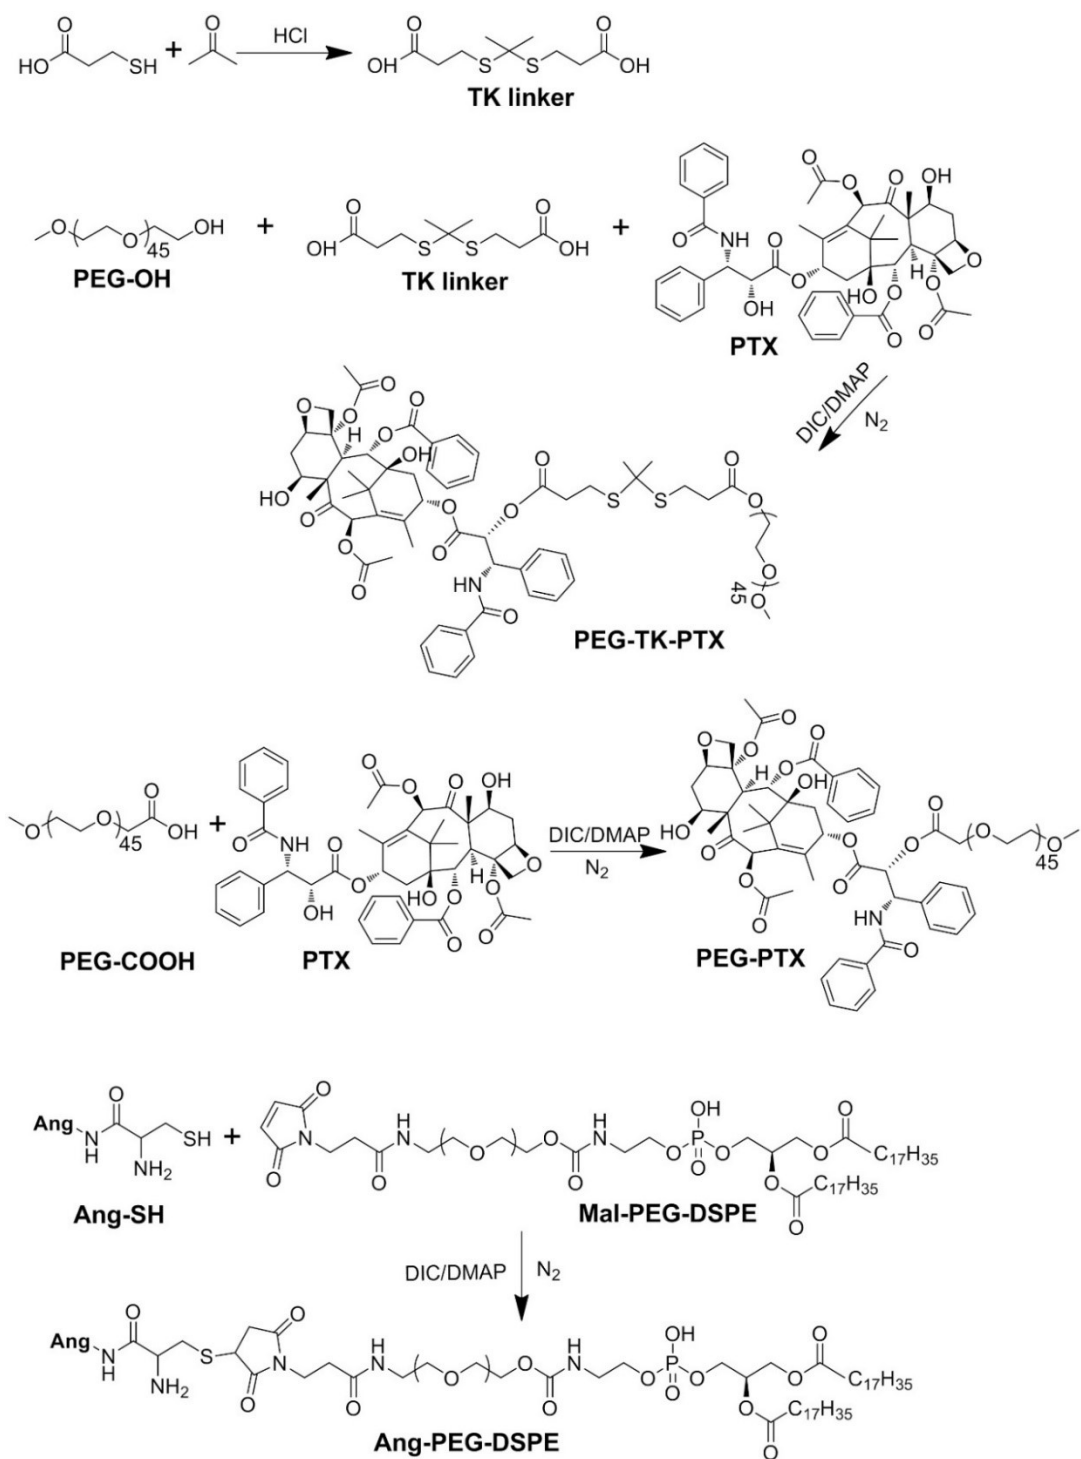

**Figure S1.** Synthetic routes for TK linker, PEG-TK-PTX, PEG-PTX and Ang-PEG-DSPE, respectively.

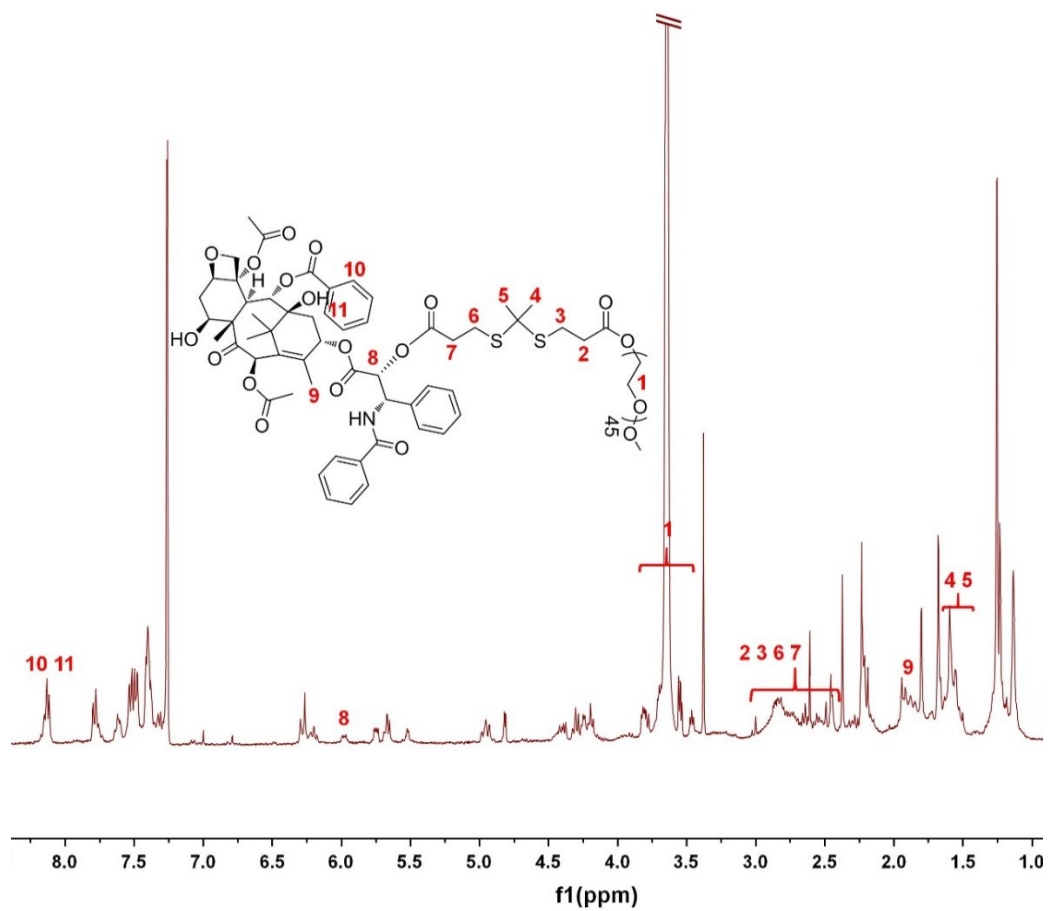

**Figure S2.** <sup>1</sup>H NMR spectrum of PEG-TK-PTX.

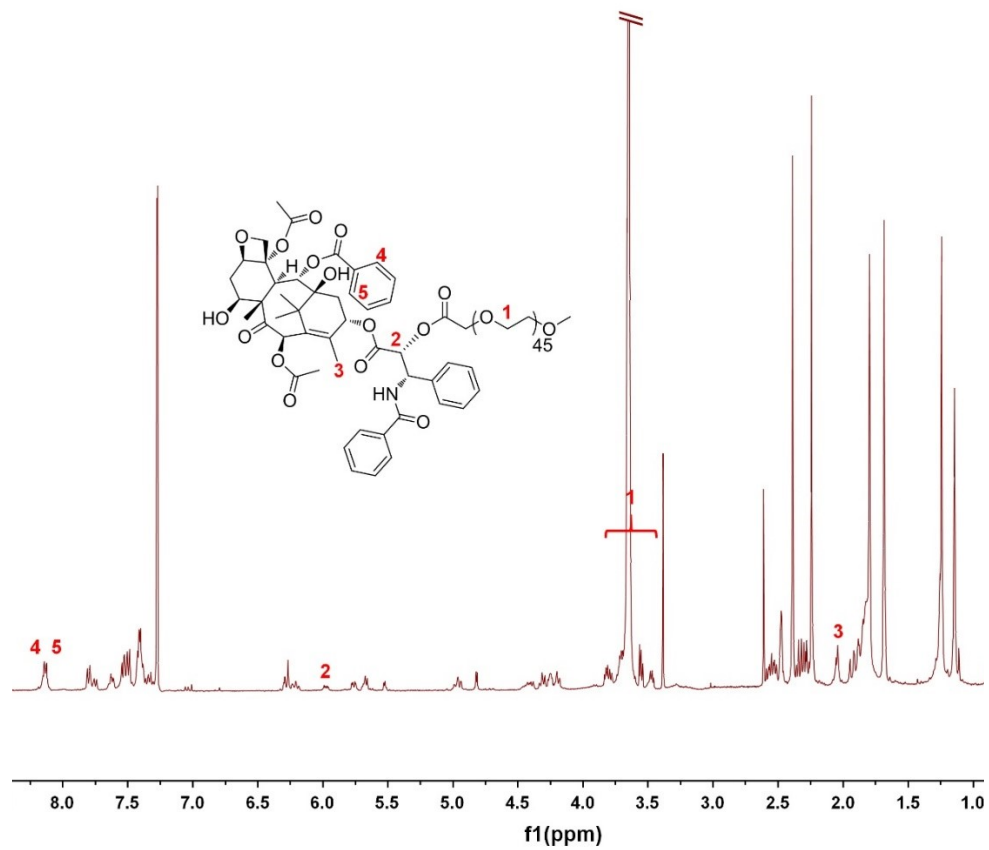

**Figure S3.** <sup>1</sup>H NMR spectrum of PEG-PTX.

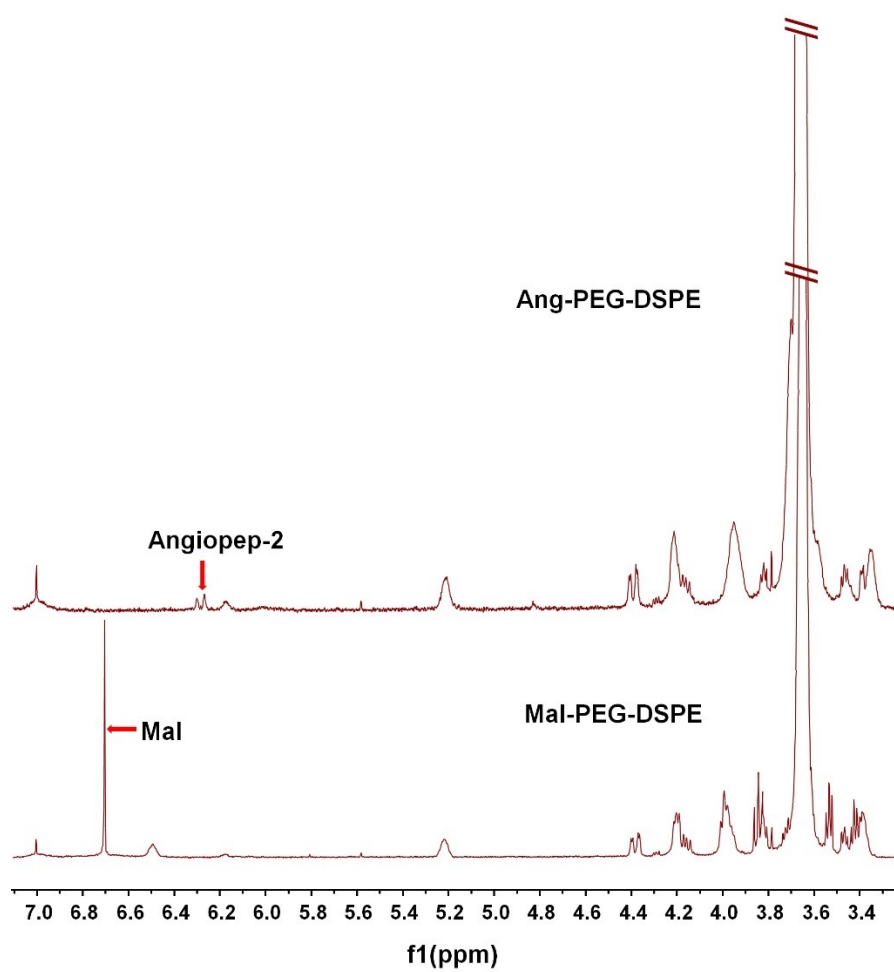

**Figure S4.** <sup>1</sup>H NMR spectrum of Mal-PEG-DSPE and Ang-PEG-DSPE.

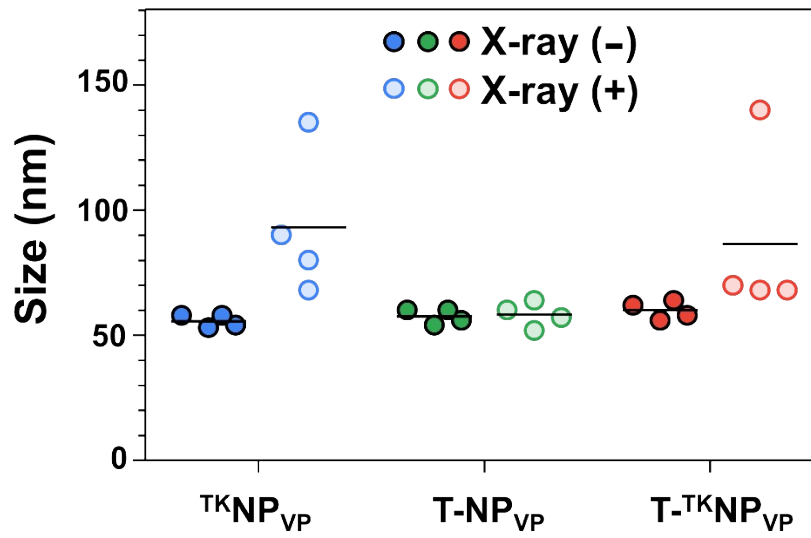

**Figure S5.** Particle size changes before and after 4 Gy of X-ray exposure.

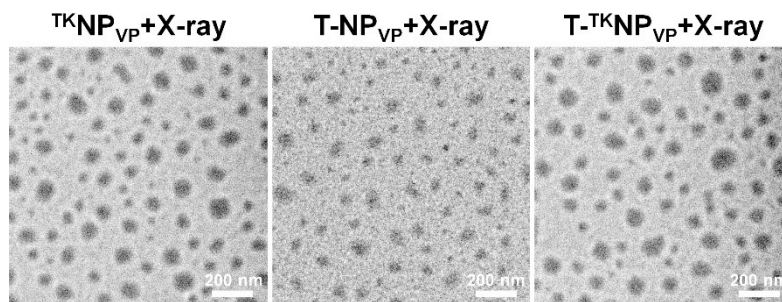

**Figure S6.** TEM images of  $^{\text{TK}}\text{NP}_{\text{VP}}$ ,  $\text{T-NP}_{\text{VP}}$  and  $\text{T-}^{\text{TK}}\text{NP}_{\text{VP}}$  after 4 Gy of X-ray irradiation.

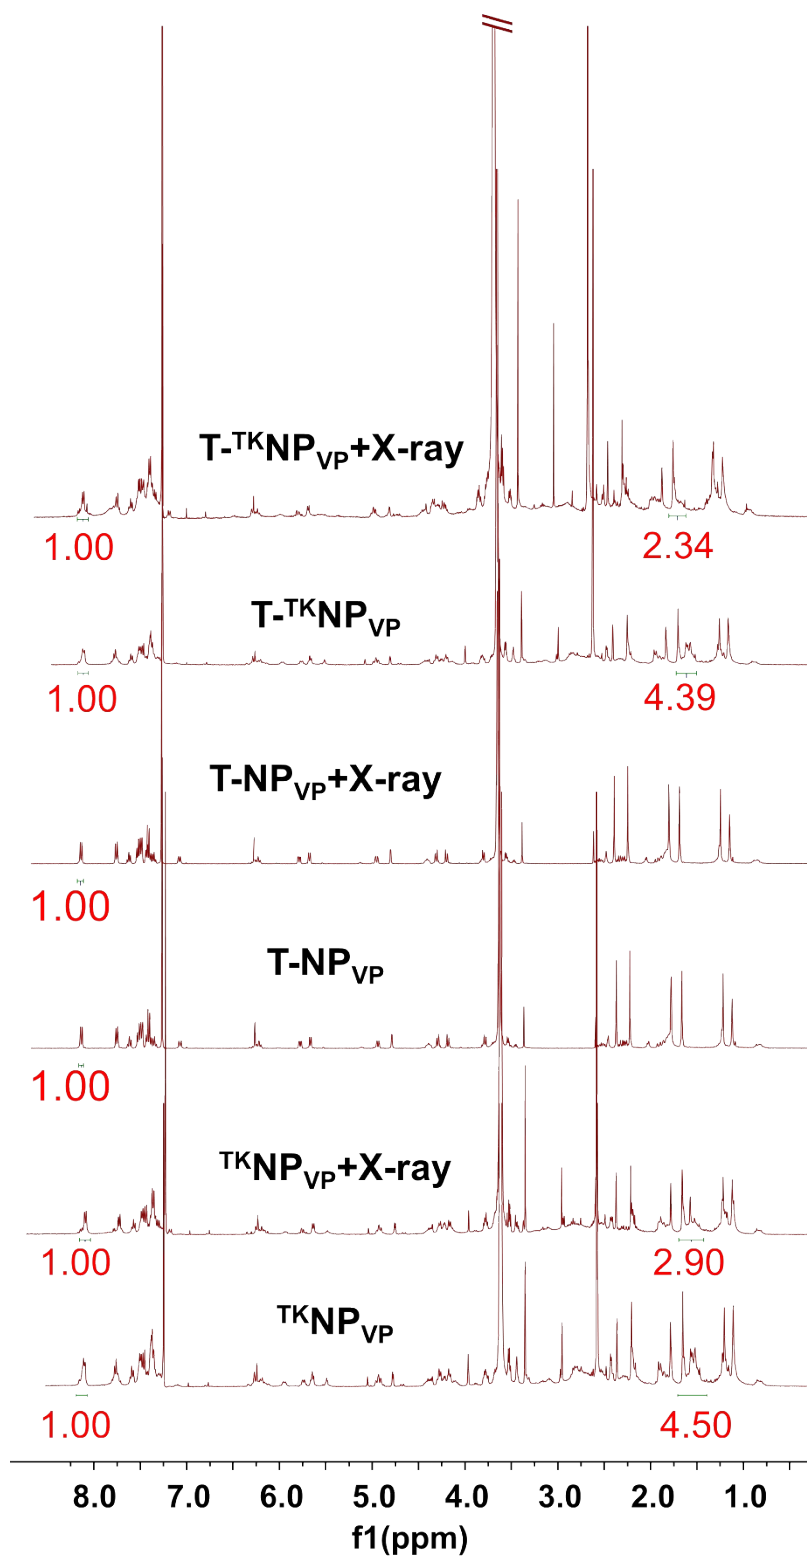

**Figure S7.** <sup>1</sup>H NMR spectra of TKNP<sub>VP</sub>, T-NP<sub>VP</sub> and T-TKNP<sub>VP</sub> before and after 4 Gy of X-ray exposure.

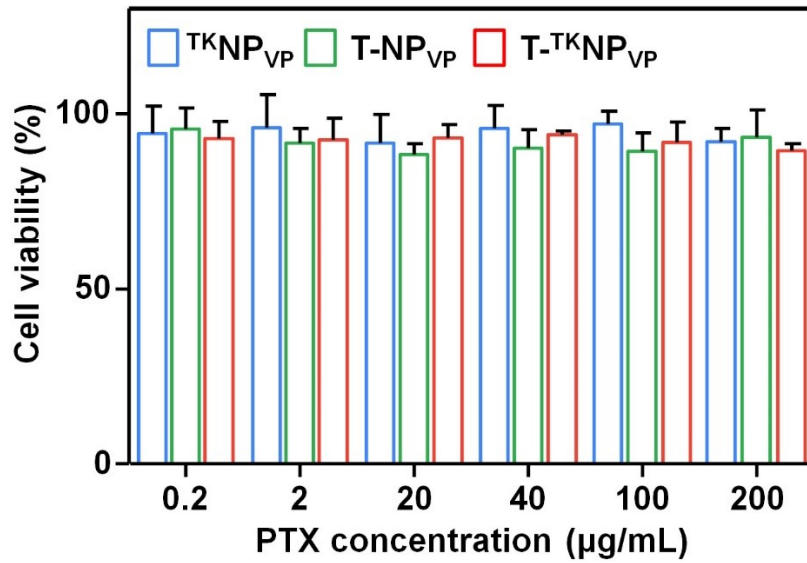

**Figure S8.** The viabilities of bEnd.3 cells after incubation with  $TKNP_{VP}$ ,  $T-NP_{VP}$  or  $T-TKNP_{VP}$  at different PTX concentrations for 24 h.

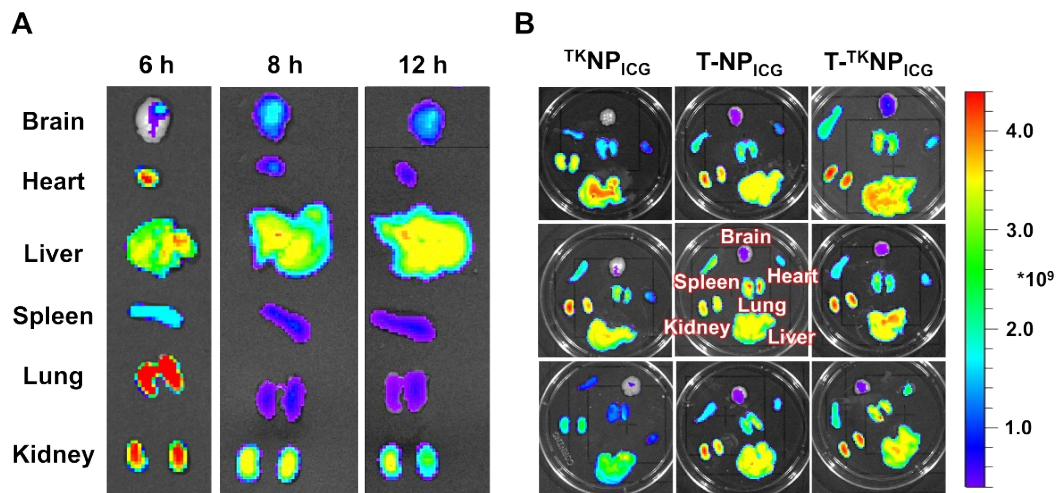

**Figure S9.** (A) Fluorescence distribution of  $T-TKNP_{ICG}$  in isolated organs at 6, 8 and 12 h post-injection. (B) Fluorescence distribution of  $TKNP_{ICG}$ ,  $T-NP_{ICG}$  or  $T-TKNP_{ICG}$  in major organs at 24 h post-injection (n = 3).



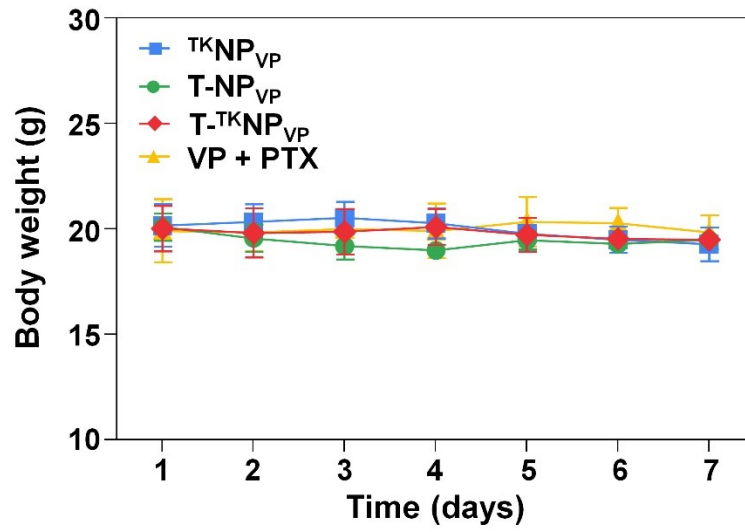

**Figure S10.** Body weight changes after treatment with various formulations.

**Table S1.** Diameter and zeta potential of  $^{TK}NP_{VP}$ ,  $T-NP_{VP}$  and  $T-^{TK}NP_{VP}$ .

|                  | diameter (nm) | polydispersity | zeta potential (mV) |
|------------------|---------------|----------------|---------------------|
| $^{TK}NP_{VP}$   | 50.17±2.90    | 0.124          | -11.8               |
| $T-NP_{VP}$      | 52.83±2.72    | 0.133          | -13.9               |
| $T-^{TK}NP_{VP}$ | 52.33±4.12    | 0.147          | -13.5               |

**Table S2.** Drug loading content (DLC) and encapsulation efficiency (EE) of  $^{TK}NP_{VP}$ ,  $T-NP_{VP}$  and  $T-^{TK}NP_{VP}$ .

|                  | DLC (%)    |           | EE (%)     |            |
|------------------|------------|-----------|------------|------------|
|                  | PTX        | VP        | PTX        | VP         |
| $^{TK}NP_{VP}$   | 20.34±1.36 | 8.46±0.62 | 78.10±5.24 | 81.17±5.95 |
| $T-NP_{VP}$      | 21.04±1.77 | 8.79±0.39 | 76.01±6.40 | 79.33±3.52 |
| $T-^{TK}NP_{VP}$ | 19.25±1.12 | 9.25±0.43 | 68.99±4.01 | 82.86±3.88 |

**Table S3.** Animal number and their body weight (unit: g) during treatment.

| Days                                  | 16            | 20            | 24            | 28            | 32            | 36            |
|---------------------------------------|---------------|---------------|---------------|---------------|---------------|---------------|
| PBS                                   | 7(19.46±0.7)8 | 7(18.54±1.89) | 6(17.53±1.38) | 3(15.46±1.30) | 1(14.5)       | 0             |
| PTX+VP                                | 7(20.24±0.38) | 7(19.54±0.79) | 6(18.75±0.97) | 4(17.02±0.60) | 2(14.95±0.65) | 0             |
| T- <sup>TK</sup> NP <sub>VP</sub>     | 7(18.54±0.8)  | 7(18.54±0.48) | 7(18.24±0.40) | 6(16.74±0.39) | 0             | 0             |
| PBS(+)                                | 7(19.33±0.42) | 7(18.54±0.73) | 7(18.33±0.43) | 7(17.33±0.42) | 6(16.25±0.95) | 4(15.5±0.35)  |
| <sup>TK</sup> NP <sub>VP</sub> (+)    | 7(19.49±0.78) | 7(19.24±1.19) | 7(19.24±0.73) | 7(19.74±0.75) | 7(19.16±0.47) | 6(15.5±0.71)  |
| T-NP <sub>VP</sub> (+)                | 7(19.56±1.81) | 7(20.84±1.97) | 7(21.17±2.15) | 7(20.56±1.24) | 7(20.43±0.42) | 7(19.79±0.88) |
| T- <sup>TK</sup> NP <sub>VP</sub> (+) | 7(19.64±0.85) | 7(19.54±1.38) | 7(20.44±1.11) | 7(20.44±0.83) | 7(20.21±0.59) | 7(19.5±0.76)  |

  

| Days                                  | 40            | 44            | 48            | 52            | 56    | 60 |
|---------------------------------------|---------------|---------------|---------------|---------------|-------|----|
| PBS                                   |               |               |               |               |       |    |
| PTX+VP                                |               |               |               |               |       |    |
| T- <sup>TK</sup> NP <sub>VP</sub>     |               |               |               |               |       |    |
| PBS(+)                                | 0             |               |               |               |       |    |
| <sup>TK</sup> NP <sub>VP</sub> (+)    | 2(14±0.71)    | 0             |               |               |       |    |
| T-NP <sub>VP</sub> (+)                | 7(19.43±0.68) | 7(20.63±0.88) | 2(15.17±0.62) | 1(14)         | 0     |    |
| T- <sup>TK</sup> NP <sub>VP</sub> (+) | 7(19.36±0.64) | 7(18.36±0.91) | 6(17.75±1.18) | 3(15.38±0.65) | 1(15) | 0  |

**Table S4.** Routine blood test of <sup>TK</sup>NP<sub>VP</sub>, T-NP<sub>VP</sub> and T-<sup>TK</sup>NP<sub>VP</sub>.

|      | PTX+VP      | <sup>TK</sup> NP <sub>VP</sub> | T-NP <sub>VP</sub> | T- <sup>TK</sup> NP <sub>VP</sub> | Unit                |
|------|-------------|--------------------------------|--------------------|-----------------------------------|---------------------|
| WBC  | 3.86±0.94   | 5.12±0.38                      | 6.4±0.88           | 7.01±0.81                         | 10 <sup>9</sup> /L  |
| RBC  | 11.3±0.58   | 11.18±0.36                     | 11.5±0.52          | 11.83±0.38                        | 10 <sup>12</sup> /L |
| Hb   | 155.25±6.1  | 152.75±4.21                    | 156.75±4.76        | 158.25±4.55                       | g/L                 |
| HCT  | 38.93±1.22  | 38.3±0.61                      | 38.98±1.06         | 39.9±1.42                         | L/L                 |
| MCV  | 34.45±1     | 34.3±0.86                      | 33.93±0.54         | 33.85±1.31                        | fL                  |
| MCH  | 13.75±0.32  | 13.68±0.36                     | 13.68±0.25         | 13.43±0.55                        | pg                  |
| MCHC | 398.75±6.98 | 398.75±5.4                     | 402.25±4.82        | 396.75±13.94                      | g/L                 |
